53. Tritapepe L, Landoni G, Guarracino F, Pompei F, Crivellari M, Maselli D, De Luca M, Fochi O, D'Avolio S, Bignami E, Calabro MG, Zangrillo A: Cardiac protection by volatile anaesthetics: A multicentre randomized controlled study in patients undergoing coronary artery bypass grafting with cardiopulmonary bypass. *Eur J Anaesthesiol* 2007; 24:323-31

54. Julier K, da Silva R, Garcia C, Bestmann L, Frascarolo P, Zollinger A, Chassot PG, Schmid ER, Turina MI, von Segesser LK, Pasch T, Spahn DR, Zaugg M: Preconditioning by sevoflurane decreases biochemical markers for myocardial and renal dysfunction in coronary artery bypass graft surgery: A double-blinded, placebo-controlled, multicenter study. *ANESTHESIOLOGY* 2003; 98:1315-27

55. Pouzet B, Lecharny JB, Dehoux M, Paquin S, Kitakaze M, Mantz J, Menasche P: Is there a place for preconditioning during cardiac operations in humans? *Ann Thorac Surg* 2002; 73:843-8

56. Belhomme D, Peynet J, Louzy M, Launay JM, Kitakaze M, Menasche P: Evidence for preconditioning by isoflurane in coronary artery bypass graft surgery. *Circulation* 1999; 100:II340-4

57. Van Der Linden PJ, Daper A, Trenchant A, De Hert SG: Cardioprotective effects of volatile anesthetics in cardiac surgery. *ANESTHESIOLOGY* 2003; 99: 516-7

58. Fellahi JL, Gue X, Philippe E, Riou B, Gerard JL: Isoflurane may not influence postoperative cardiac troponin I release and clinical outcome in adult cardiac surgery. *Eur J Anaesthesiol* 2004; 21:688-93

59. Piriou V, Mantz J, Goldfarb G, Kitakaze M, Chiari P, Paquin S, Cornu C, Lecharny JB, Aussage P, Vicaute E, Pons A, Lehot JJ: Sevoflurane preconditioning at 1 MAC only provides limited protection in patients undergoing coronary artery bypass surgery: A randomized bi-centre trial. *Br J Anaesth* 2007; 99:624-31

## ■ ANESTHESIOLOGY REFLECTIONS

### New Yorkers Foregger and Connell

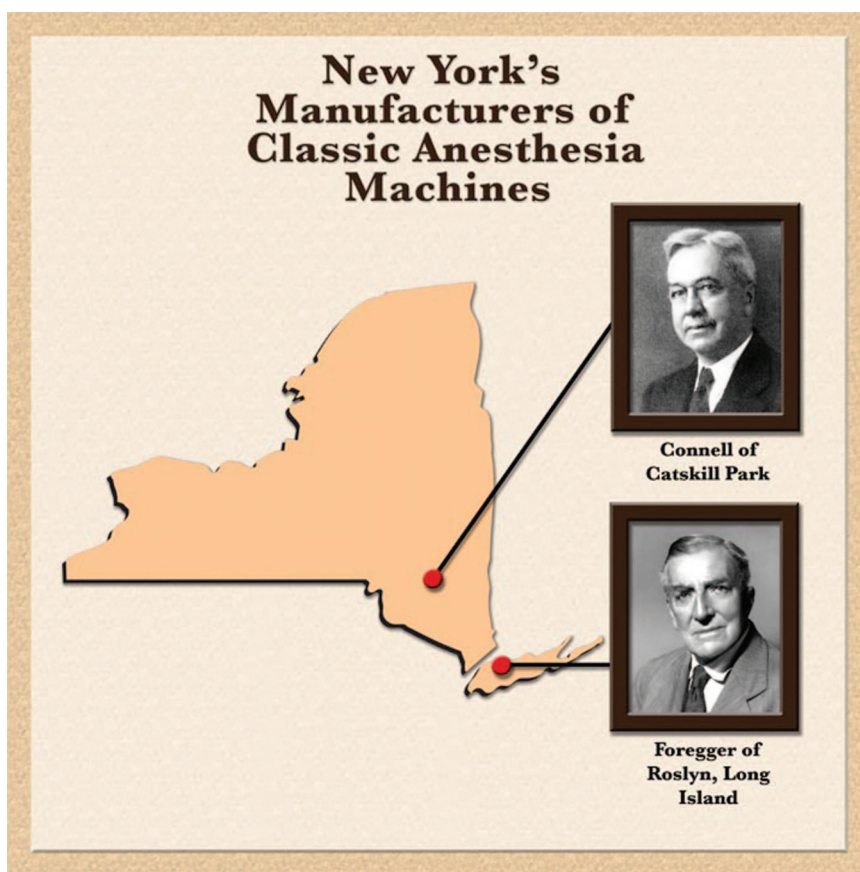

Born in Vienna, Austria, Richard von Foregger (1872–1960) earned his Ph.D. on the Continent before working with Carl Steinmetz in New York. After fusing sodium peroxide to generate oxygen, Foregger founded his namesake company in Roslyn, New York. Over the next 40 yr he assisted development of anesthetic apparatus such as the Gwathmey Apparatus, Waters' To-and-Fro Canister, and Morris' "Copper Kettle" precision vaporizer. Competing against Foregger was a Nebraskan-turned-New Yorker, Karl Connell, M.D. (1878–1941), who invented the Anesthetometer and developed at least three types of flowmeters for his finely calibrated Connell Anesthesia Machines. Both of these adopted sons of New York produced anesthetic apparatus and machines using suggestions supplied by practicing anesthesiologists. (Copyright © the American Society of Anesthesiologists, Inc. This image appears in color in the *Anesthesiology Reflections* online collection available at [www.anesthesiology.org](http://www.anesthesiology.org).)

George S. Bause, M.D., M.P.H., Honorary Curator, ASA's Wood Library-Museum of Anesthesiology, Park Ridge, Illinois, and Clinical Associate Professor, Case Western Reserve University, Cleveland, Ohio. [UJYC@aol.com](mailto:UJYC@aol.com).
